# Supplementary material for: Cyclodextrin polymer-confined urease for the fast and efficient removal of urea
Source: Royal Society of Chemistry journal article supplement (doi:10.1039/d2nj03303h), 2022-01-01
Supplement: d2nj03303h1.pdf [file d2nj03303h1.pdf]

Supplementary information

**Cyclodextrin polymers confined urease for the fast and efficient urea removal**

Cui Ren, He Wang, Yue Cheng\*, Xiaofei Ma\*, Yong Wang

*Department of Chemistry, School of Science, Tianjin University, Tianjin, 300072,*

*China*

*\*Corresponding authors :*

*Yue Cheng, chengyue90@tju.edu.cn; Xiaofei Ma, maxiaofei@tju.edu.cn*

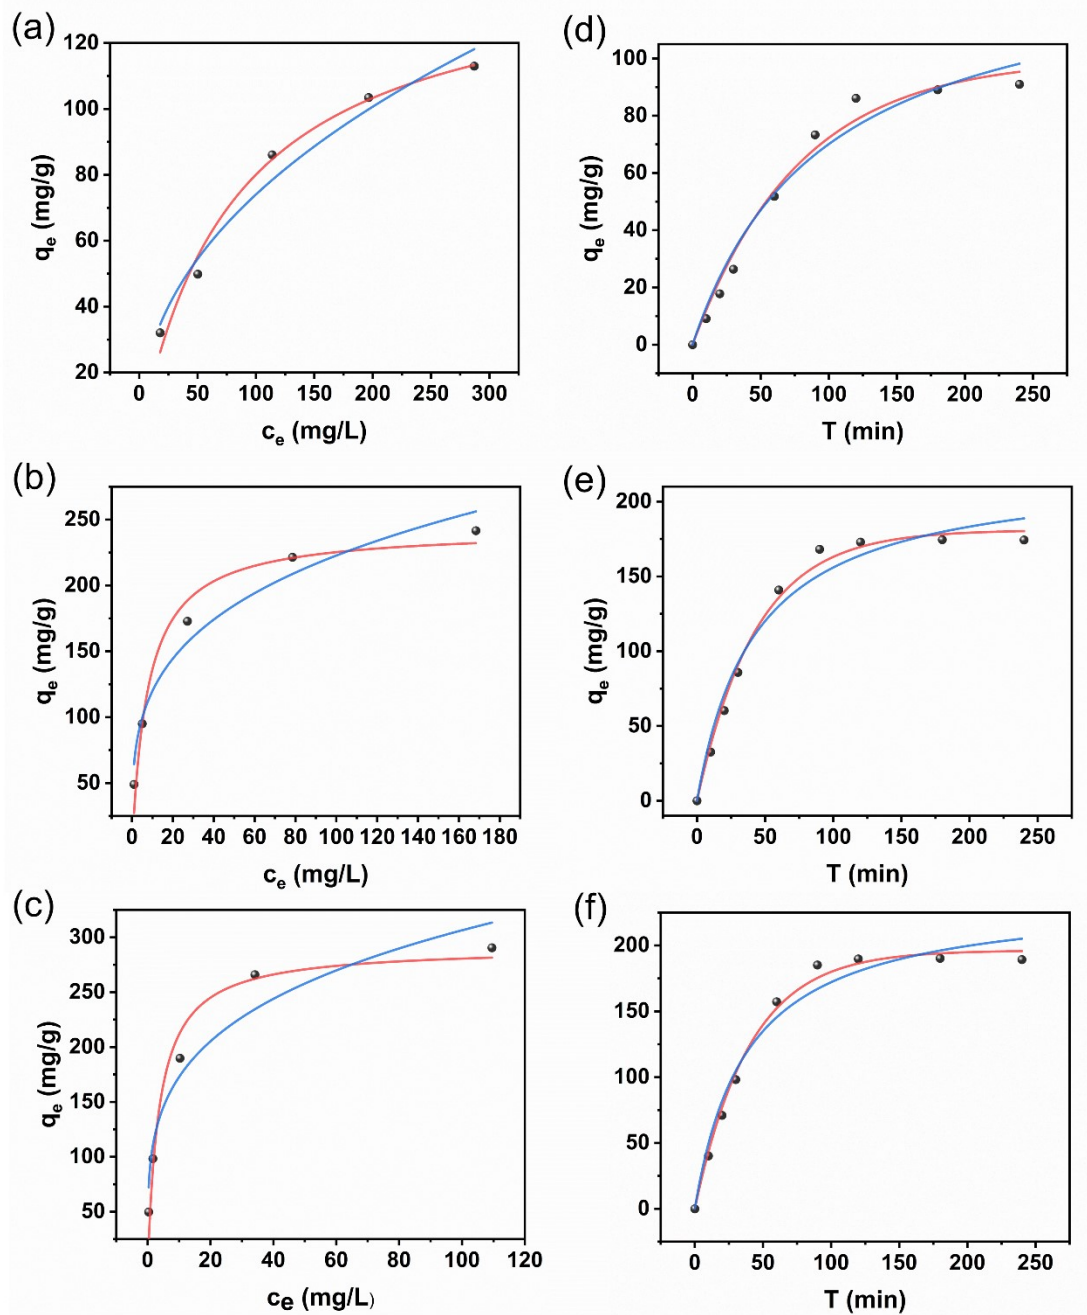

**Fig. S1** The non-linear fitting graphs of the Langmuir model (red) and the Freundlich model (blue) of urea removal by (a) UrCDP34-2, (b) UrCDP34-4 and (c) UrCDP34-6. The non-linear fitting graphs of the pseudo-first-order kinetic model (red) and pseudo-second-order kinetic model (blue) of urea removal by (d) UrCDP34-2, (e) UrCDP34-4 and (f) UrCDP34-6.
